# Supplementary material for: Dental pathologies in lamniform and carcharhiniform sharks with comments on the classification and homology of double tooth pathologies in vertebrates
Source: PeerJ. 2022 May 11;10:e12775. doi: 10.7717/peerj.12775 (PMC9107304; doi:10.7717/peerj.12775)
Supplement: Supplemental Information 1 — Table shows diameter measurements of multiple main ascending and secondary canals in O. megalodon teeth (NCSM 9545 and NCSM 33639) at five different localities throughout the tooth from the root to the apex. The average diameter of the main ascending and secondary canals are calculated, as well as the difference in diameter between the two canal types for both teeth. A total average is calculated for the diameter of the main ascending and secondary canals and the difference in diameter between the two canal types. All measurements are taken in units of μm. [file peerj-10-12775-s001.xlsx]

## Sheet: Sheet1
NCSM 9545	Pt. 1 (closest to root) (μm)	Pt. 2 (μm)	Pt. 3 (μm)	Pt. 4 (μm)	Pt. 5 (μm)	Pt. 6 (closest to apex) (μm)
Ascending Canal 2	403.802	403.802	376.882	376.882	430.722	269.201		9545 AC Average	369.54
Ascending Canal 2	-	511.483	242.281	376.882	349.962	323.042		9545 SC Average	184.852
Secondary Canal 1	134.601	188.441	188.441	134.601	188.441	-
Secondary Canal 2	134.601	188.441	242.281	269.201	161.521	-		9545 AC/SC Difference	1.99912
Secondary Canal 3	188.441	188.441	188.441	188.441	188.441	-
										Total AC Average	358.448
NCSM 33639	Pt. 1 (closest to root) (μm)	Pt. 2 (μm)	Pt. 3 (μm)	Pt. 4 (μm)	Pt. 5 (μm)	Pt. 6 (closest to apex) (μm)				Total SC Average	175.71
Ascending Canal 1	538.403	323.042	215.361	323.042	269.201	-
Ascending Canal 2	376.882	269.201	296.122	376.882	403.802	-				Total AC/SC Difference	2.04
Ascending Canal 3	565.323	242.281	269.201	269.201	242.281	215.361
Ascending Canal 4	-	323.042	242.281	376.882	430.722	242.281		33639 AC Average	347.357
Ascending Canal 5	-	457.642	296.122	323.042	-	-		33639 SC Average	166.568
Ascending Canal 6	-	484.563	296.122	430.722	753.764	296.122
Ascending Canal 7	-	-	269.201	349.962	-	-		33639 AC/SC Difference	2.08537
Secondary Canal 1	215.361	134.601	134.601	215.361	269.201	161.521
Secondary Canal 2	188.441	107.681	134.601	215.361	161.521	-
Secondary Canal 3	161.521	134.601	161.521	107.681	161.521	-
